# Supplementary material for: Improved Cardiopulmonary Resuscitation Performance With CODE ACES2: A Resuscitation Quality Bundle
Source: PubMed Central journal article supplement — J Am Heart Assoc. 2018 Dec 7;7(24):e009860. doi: 10.1161/JAHA.118.009860 (PMC6405605; doi:10.1161/jaha.118.009860), 2018-12-07
Supplement: JAH3-7-e009860-s001.pdf [file JAH3-7-e009860-s001.pdf]

# **SUPPLEMENTAL MATERIAL**

## **Data S1. Johns Hopkins Resuscitation Debriefing Privacy and Confidentiality.**

### Johns Hopkins Resuscitation Debriefing Privacy and Confidentiality

Thank you for coming today to discuss and learn from last week's pediatric cardiac arrest events. The purpose of this QI initiative is to identify every pediatric cardiac arrest event in the hospital, discuss what went well and what didn't in order to develop strategies to improve performance in the future. In order to inform each case's discussion we will review as much objective data as possible in order to identify instances of high and low performance and to gain insight as to what have mediated them such as communication, leadership, shared mental models, equipment and room ergonomics. There is increasing literature which suggests that debriefing real events with data from those events leads to subsequent future performance benefits and we are operating in part using this concepts and methods from this evidence. Although objective data is our gold standard we also recognize the complexity of these events and the importance of your observations and actions. Understanding what decisions were made during these events provide tremendous valuable insight as to why things happened the way they did and what we might learn from them to take with us into the future. To that end we ask questions from a place of genuine curiosity with an aim to learn and never to interrogate or to make anyone feel bad; we will try our hardest to ask questions respectfully and always with a productive purpose in mind. We know that everyone here is intelligent, has worked and trained hard, and wants to provide the best care possible to children in the hospital every day. We ask that everyone honors that commitment and one another by sharing the lessons learned from this discussion while maintaining the privacy and confidentiality of each other.

**Table S1. Johns Hopkins Pharmacy Acute Event Peer-to-Peer Debriefing Form.**

**Pediatric RRT/ PICU Code Blue/Alpha Trauma/DART Response Debriefing for Pharmacy  
Privileged and Confidential/Peer Review Protected**

**\*\*\*\*Please use blue or black pen\*\*\*\***

Event Date: \_\_\_\_\_ Event Time: \_\_\_\_\_ AM/PM Location: \_\_\_\_\_ MRN: \_\_\_\_\_

Patient Name: \_\_\_\_\_ Patient Weight: \_\_\_\_\_ kg Patient in Isolation: Yes No

Pharmacist Completing Form: \_\_\_\_\_ Other Responding Pharmacist(s): \_\_\_\_\_

1. Indication for the Pediatric RRT/PICU Code Blue/DART:

- Respiratory Distress     Cardiac Arrest     Anaphylaxis     Altered Mental Status  
 Hypotension     Seizure     DART     Other: \_\_\_\_\_

2. Which of the 5 questions of the Pharmacist's script were asked?

- Who is the team leader?     Yes     No  
Who is the medication RN     Yes     No  
What is the patient's weight?     Yes     No  
Does the patient have a working IV?     Yes     No  
What algorithm is being followed?     Yes     No

If no, which questions were not asked and why? \_\_\_\_\_

3. Medications administered (please list):

\_\_\_\_\_

4. Timing of first epinephrine dose after initiation of chest compressions: \_\_\_\_\_

5. Was ECMO discussed/activated after the first dose of epinephrine?     Yes     No

6. Number of doses of epinephrine administered: \_\_\_\_\_

7. Were all doses of epinephrine given within the recommended 3 - 5 minute interval?     Yes     No

8. Was sodium bicarbonate administered?     Yes     No

If yes, what was the indication:     Acidosis     Hyperkalemia     Unknown

9. Was calcium chloride/gluconate administered?     Yes     No

If yes, what was the indication:     Hypocalcemia     Hyperkalemia     Unknown

10. Were there any missing medication(s) or supplies?     Yes     No

If yes, please list: \_\_\_\_\_

11. Any concerns about teamwork/communication?     Yes     No

If yes, please describe: \_\_\_\_\_

12. Any positive feedback about teamwork/communication?     Yes     No

If yes, please describe: \_\_\_\_\_

13. List any interventions you made that you would like to share?

\_\_\_\_\_

**Table S2. Johns Hopkins Resuscitation Debriefing and Discussion Guide.**

Johns Hopkins Resuscitation Debriefing and Discussion Guide

1. Review **patient history**: 2-3 Sentences with relevant medical history, present illness, any prior cardiac arrest this admission/ever.
2. Describe **preceding events**: conditions, exposures, and perceived stability leading up to the event. Discuss likelihood and nature of arrest onset, gradual vs. precipitous, expected vs. sudden, potential causal interventions. Given pre-arrest timing and duration Inquire what was done (if anything) to prepare.
3. Discuss physiology-basis or team-decision making that prompted **the initiation of CPR**.
4. Describe the **first few minutes** of the resuscitation including: initiation of CC, quality of CPR, role assignments, kinetics, sound, CRM/TeamSTEPPS challenges/wins.
5. Review **objective data** including bedside monitor second to second data and JH CPR Performance Report Card (if available). For OR/Cath/MRI review Anesthesia record.
6. Discuss **coaching** feedback direction style used and methods employed: was it quantitative “make your rate 100 / try to get co2 >20”, qualitative “good depth”, relative “deeper/ slower”, reinforcing “good job, just like that”. Which were effective and why?
7. **Pharmacy**: medication administration, access, dosing, communication, algorithm adherence, 5 questions asked?
8. **Redo / Repeat**: if you could go back and change something what would be? If we should repeat something for similar patients / situations, what should it be?
9. Event impact **on non-event related patient care**. Open discussion as we evolve discussion points: think how were resources allocated safely / unsafely/ unintended consequences due to response, etc.
10. General **ECPR** topics to include: candidacy discussion/confusion. If activated within in appropriate timing. Were ECPR benchmarks met?
11. Time permitting: **precision/personalized CPR** approach for this patient. Was discussed prior to arrest? Was adhered to?

# Figure S1. Johns Hopkins Kids Kard Pediatric Acute Emergencies Cognitive Aid\*

\*Cognitive Aid for pediatric emergencies with area designed to support cardiac arrest management, includes AHA CPR depth and rate targets, and expert consensus-based targets

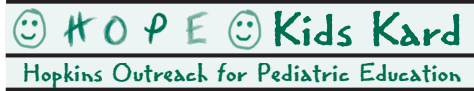

**\*\*FOR EMERGENCY CONSULT OR TRANSPORT**  
**Maryland Regional Neonatal Network..... 1-888-540-6767**  
**Pediatric Transport Team—Call HAL (Hopkins Access Line), 410-955-9444**  
**H.O.P.E. Office ..... 410-614-1960**  
**Neonatal Intensive Care Unit ..... 410-955-5255**  
**Pediatric Burn Center.....1-888-KID-BURN**  
**Pediatric Emergency Department..... 410-955-5680**  
**Pediatric Intensive Care Unit ..... 410-955-5260**  
**Pediatric Trauma Office ..... 410-614-1811**  
**Maryland Poison Control.....1-800-222-1222**

## GLASGOW COMA SCALE

If GCS <8, initiate neuroprotective intubation  
 See below for ICP management • Call Pediatric Rapid Response Team

| Activity    | Score | Infant                         | Score | Child/Adult         |
|-------------|-------|--------------------------------|-------|---------------------|
| EYE OPENING | 4     | Spontaneous                    | 4     | Spontaneous         |
|             | 3     | To speech or sound             | 3     | To speech           |
|             | 2     | To painful stimuli             | 2     | To pain             |
| VERBAL      | 5     | Coos / babbles                 | 5     | Oriented            |
|             | 4     | Irritable cry                  | 4     | Confused            |
|             | 3     | Cries to pain                  | 3     | Inappropriate words |
| MOTOR       | 6     | Normal spontaneous movement    | 6     | Obeys commands      |
|             | 4     | Withdraws to touch             | 5     | Localizes pain      |
|             | 3     | Abnormal flexion (decorticate) | 4     | Abnormal flexion    |

### INCREASED ICP

**SYMPTOMS:** GCS < 8, HTN, bradycardia, altered respirations, asymmetric and/or fixed and dilated pupils

**ETIOLOGY:** TBI, Brain tumor, DKA, Acute Hypoxic Ischemic Encephalopathy, CVA

→ Head of Bed (maintain c-spine stabilization for Trauma)  
 • Hyperventilate with BMV (goal ETCO<sub>2</sub> 35, if acute herniation may use lower goal)  
 • Head midline  
 • Ensure cervical collar not obstructing venous flow  
 • Hypertonic saline (See PANEL 8, Increased ICP for dosing)  
 • Mannitol (See PANEL 8, Increased ICP for dosing)  
 • Neuroprotective intubation  
 • Avoid hypotension and hypoxia  
 • Avoid Temp > 37° C

### ELECTROLYTE DISTURBANCES

**HYPOGLYCEMIA** – dextrose: < 1 month: D10 5-10 mL/kg; > 1 month: D25 2-4 mL/kg  
 Adolescent: D50 ± 2 mL/kg [All equivalent to 0.5–1 G/kg – Max of 50G for all ages]

**HYPERKALEMIA** - CaCl or gluconate, NaHCO<sub>3</sub>, insulin with dextrose;  
 In subacute setting consider albuterol, Kaexylate, Lasix and dialysis

**ACUTE HYPONATREMIA** Concern of seizure or acute neurologic emergency:  
 To ↑ Na by 5: 2% NaCl/NaHCO<sub>3</sub> (buffered saline) – 40 mL/kg;  
 2% NaCl – 9 mL/kg; 3% NaCl – 6 mL/kg

**PANEL 1** © Hunt, Nelson-McMillan, McNamara, Helder

## SHOCK GUIDELINES

**Time Zero, i.e. upon recognition of Shock:**  
 • FiO<sub>2</sub> 100% NRB, CR monitor, large bore IV access x 2 (consider early IO)  
 • Fluid Resuscitation: 20 mL/kg of NS or LR IV/IO over 5 minutes, repeat as necessary, i.e. 60 mL/kg over 15 minutes, acute if necessary  
 • Volume Sensitive children, i.e. chronic lung, cardiac or renal disease, neonates < 28 days: 5–10 mL/kg of NS or LR IV/IO over 5 min x 3;  
 Evaluate liver edge before & after fluid boluses for fluid overload  
 • Check dextrose and calcium, treat if low  
 • If patient has known history of recent steroid use or dependence consider stress dose steroids: i.e. SLE, organ transplant, asthma, cancer, etc...  
 • 15 minutes, if Fluid Resistant: Start Dopamine and titrate to maintain goal BP  
 30 minutes, if Dopamine Resistant:  
 • COLD SHOCK: EPINEPHRINE • WARM SHOCK: Norepinephrine  
 60 minutes, if Fluid AND Shock Resistant:  
 • Empiric stress dose Hydrocortisone for adrenal insufficiency. See PANEL 5 for dosing  
 • Treat until perfusion normalized  
 • Administer IV antibiotics early if considering septic shock. See PANEL 7 for dosing  
 • Consider empiric alprostadil for neonatal shock (i.e. congenital heart disease). See PANEL 5 for dosing  
 • Consider Milrinone for cardiogenic shock if BP stable. See PANEL 7 for dosing  
 • Consider Massive Transfusion Protocol if estimated blood loss ≥40% blood volume or ongoing blood loss (blood volume: 70–90 mL/kg, depending on age)

## ANAPHYLAXIS

IM EPINEPHRINE (Tx for 2 or more symptoms; may repeat in 5–15 min), FiO<sub>2</sub> 100% NRB, Fluid per shock guidelines, diphenhydramine, steroids, ranitidine, albuterol, racemic EPINEPHRINE

## CARDIAC EMERGENCIES (For Cardiac Arrest See PANEL 4)

**Blocked BT Shunt**  
 Call RRT, goals: increase SVR, lower PVR: FiO<sub>2</sub> 100%, heparin bolus (100 units/kg IV/IO); Max dose of 1,000 units), phenylephrine 5-10 mcg/kg IV (up to 30 mcg/kg, Max 200 mcg), Propranolol 0.15 mg/kg/dose (Max dose 1 mg)

**Pulmonary hypertensive crisis**  
 • Potential acute management: FiO<sub>2</sub> 100%, NS IV bolus 10 mL/kg, sedation and paralysis with secure airway (with ETCO<sub>2</sub>); hyperventilation (goal pCO<sub>2</sub> close to 35), Nitric Oxide, inhaled Prostacyclin (Flolan), Sildenafil  
**Junctional ectopic tachycardia (JET)**  
 • Consider for post-op cardiac pt with absent or abnormal p waves (obtain atrial EKG if wires present), HR may be normal or tachycardic, BP may be normal or low  
 • Potential management: If already intubated, sedation and possible paralysis; IV bolus 5 mL/kg if hypotensive; correct Ca, K and Mg if low levels, avoid temp > 36.5° C and aggressively treat fever; wean catecholamine vaso pressors; if hemodynamically unstable or recurrent episodes, amiodarone 2.5-5 mg/kg (max 300 mg) IV bolus over 20 minutes (consider premed with Ca); override pacing if atrial wires, consider cooling below 36.5° C  
**SVT** - see Fast Pulse, (Panel 4)  
**Tamponade:**  
 • Diagnostic: Consider in any pt with hypotension, tachycardia, ↑CVP, poor perfusion with widening mediastinum, CVP in place or recent cardiac procedure;  
 • Treatment: Call RRT, urgent ECHO, maintain preload with volume, consider urgent pericardiocentesis if unstable

## UPPER AIRWAY EDEMA/OBSTRUCTION

**Upper Airway Edema** Consider dexamethasone, racemic EPINEPHRINE nebs, heliox, positive pressure  
**Bronchospasm/RADE/Status Asthmaticus** Consider continuous albuterol, Inhaled ipratropium, IV steroids, IV magnesium, BIPAP, Heliox, IV aminophylline; if in extremis, IV etomidate, IV amphotericin

## BURN FORMULA

**Burn Depth**  
 Superficial Burn = Sunburn  
 Partial Thickness = Blisters (closed or open)  
 Full Thickness = Black or White (leathery eschar)

**Estimate % BSA of burn**  
 Using child's palm:  
 1 palm = 1% BSA

3 mL x body weight (kg) x % partial and full thickness burns = Volume of LR to be replaced  
 Give ½ over first 8 hours from time of burn • Give ½ over the next 16 hours  
 Must also add maintenance fluid rate and glucose for infants < 10 kg

**PANEL 2**

## PEDIATRIC PARAMETERS & EQUIPMENT

|               | premie       | new born    | 6 MO         | 1 YR        | 2-3 YR      | 4-6 YR       | 7-10 YR        | 11-15 YR   | >16 YR     |
|---------------|--------------|-------------|--------------|-------------|-------------|--------------|----------------|------------|------------|
| WT(KG)        | 2.5-3.5 kg   | 3.5-4 kg    | 6-8 kg       | 10 kg       | 13-16 kg    | 20-25 kg     | 25-35 kg       | 40-50 kg   | >50 kg     |
| BMV           | Infant       | Infant      | Small Child  | Small Child | Child       | Child        | Child/S. Adult | Adult      | Adult      |
| NASAL AIRWAY  | 12 Fr        | 12 Fr       | 14-16 Fr     | 14-16 Fr    | 14-18 Fr    | 14-18 Fr     | 16-20 Fr       | 18-22 Fr   | 22-36 Fr   |
| ORAL AIRWAY   | Infant 50 mm | Small 60 mm | Small 60 mm  | Small 60 mm | Small 70 mm | Small 70 mm  | Small 80-90 mm | Med 90 mm  | Med 90 mm  |
| BLADE         | MIL 0        | MIL 0       | MIL 1        | MIL 1       | MIL 1       | MIL 2        | MIL 2          | MIL 2      | MIL 2      |
| ETT           | 2.5-3.0      | 3.0-3.5     | 3.5-4.0      | 4.0-4.5     | 4.5-5.0     | 5.0-5.5      | 5.5-6.0        | 6.0-6.5    | 7.0-8.0    |
| LMA           | 1            | 1           | 1.5          | 2           | 2           | 2.5          | 2.5-3          | 3          | 4          |
| GLIDESCOPE    | 1            | 1 or 2      | 2            | 2           | 3           | 3            | 3              | 3 or 4     | 3 or 4     |
| IV CATH       | 22-24 ga     | 22-24 ga    | 20-24 ga     | 20-24 ga    | 18-24 ga    | 18-22 ga     | 18-22 ga       | 18-20 ga   | 18-20 ga   |
| CVL           | 3 Fr 5 cm    | 3-4 Fr 5 cm | 4 Fr 8-12 cm | 4-5 Fr 8 cm | 4-5 Fr 8 cm | 5 Fr 8-12 cm | 5 Fr 12 cm     | 7 Fr 15 cm | 7 Fr 15 cm |
| NGT/OGT       | 5 Fr         | 5-8 Fr      | 8 Fr         | 10 Fr       | 10-12 Fr    | 12-14 Fr     | 12-14 Fr       | 14-18 Fr   | 14-18 Fr   |
| BP CLIFF SIZE | New Born     | Infant      | Small Child  | Small Child | Child       | Child        | Child/S. Adult | Adult      | Adult      |
| CHEST TUBE    | 10-12 F      | 10-12 F     | 12-18 F      | 16-20 F     | 16-24 F     | 20-28 F      | 20-32 F        | 28-38 F    | 28-42 F    |
| FOLEY         | 6 Fr         | 8 Fr        | 8 Fr         | 8 Fr        | 8 Fr        | 8 Fr         | 8 Fr           | 10 Fr      | 12 Fr      |

## ESTIMATED BLOOD PRESSURE - BY AGE

| Blood pressure measurement | 50th %           | 5th %                                                                    |
|----------------------------|------------------|--------------------------------------------------------------------------|
| Systolic BP                | 90 + (age x 2)   | 60 [neonate]; 70 [1mo-1 yr]; 70 + (age x 2) [for 2-10 yrs]; 90 [>10 yrs] |
| MAP                        | 55 + (age x 1.5) | 40 + (age x 1.5)                                                         |

## NORMAL VS BY AGE (approximations only)

| Age      | HR (beats/min) | BP (mm Hg)                                        | RR (breaths/min) |
|----------|----------------|---------------------------------------------------|------------------|
| Premie   | 120-170        | 55-75/35-45 (gestational age approximates mm MAP) | 40-70            |
| 0-3 mo   | 110-160        | 65-85/45-55                                       | 30-60            |
| 3-6 mo   | 100-150        | 70-90/50-65                                       | 30-45            |
| 6-12 mo  | 90-130         | 80-100/55-65                                      | 25-40            |
| 1-3 yrs  | 80-125         | 90-105/55-70                                      | 20-30            |
| 3-6 yrs  | 70-115         | 95-110/60-75                                      | 20-25            |
| 6-12 yrs | 60-100         | 100-120/60-75                                     | 14-22            |
| >12 yrs  | 60-100         | 100-120/70-80                                     | 12-18            |

## IV FLUID RATES & URINE OUTPUT

**MAINTENANCE IV FLUIDS**  
 4 mL/kg/hr for first 10 kg  
 2 mL/kg/hr for next 10 kg  
 1 mL/kg/hr for every kg > 20 kg

**URINE OUTPUT**  
 Normal 1 - 2 mL/kg/hr  
 Volume Sensitive 0.5 - 1 mL/kg/hr

## FORMULAS

- Wt estimate: 3 (age in years) + 7  
 - Uncuffed ETT size: age (years)/4 + 4; Cuffed ETT size: age (years)/4 + 3  
 - ETT depth (from lip to mid-trachea): ETT internal diameter (size) x 3  
 - O<sub>2</sub> remaining in H cylinder: tank pressure (psi) x 3.14/LPM = minutes of O<sub>2</sub> left at that liter flow

**PANEL 3**

## Johns Hopkins Kids Kard

### CARDIOPULMONARY ARREST

\*\*\* Highest Priorities: High Quality CPR and Rapid Defibrillation

**High Quality CPR**  
 Push hard (Infant >1.5 in, Child >2 in) Backboard  
 Push fast (100-120/min) Stepstool  
 Full Recoil Defibrillator pads at all times  
 Bag with FiO<sub>2</sub> 100% EndTidal CO<sub>2</sub> at all times  
 Switch compressors q 2 min Quality CPR Coach  
 \*\* If not intubated, synchronize chest compressions and ventilations:  
 child > 8yo: 30:2 (5 cycles = 2 minutes → change compressors)  
 child < 8yo: 15:2 (10 cycles = 2 minutes → change compressors)

**Physiologic Goals**  
 ETCO<sub>2</sub> > 20-25  
 Diastolic pressure > 30 (consider emergent arterial line)  
 Coronary Perfusion Pressure (CPP) > 20 (i.e. diastolic pressure - CVP)  
 \*\*\* If in an ECMO Center, activate ECMO IF CPR still needed at 5 min

## PALS Cardiac Arrest Algorithms \*See Panel 5 for dosing

**V FIB OR PULSELESS VT TACH:**  
 - Immediate high quality CPR  
 - Defib in < 180 seconds (or earlier if possible):  
 q 2 minutes [1st: 2 J/kg → 2nd: 4 J/kg → consider single dose: 10 J/kg if refractory]  
 - If 2nd shock unsuccessful, start EPINEPHRINE q 4 minutes  
 - If EPINEPHRINE not successful, start Amiodarone or Lidocaine q 4 minutes  
 (Alternate Epi and Amio/Lido, e.g. Epi/Amio/Epi/Amio)  
 - If Torsades de Pointes or hypomagnesemia, give magnesium sulfate  
 - Consider reversible causes as below

**ASYSTOLE & PEA**  
 - Immediate high quality CPR  
 - EPINEPHRINE q 4 minutes  
 - Consider reversible causes as below

**BRADYCARDIA, ie. HR < 60 WITH POOR PERFUSION**  
 - Immediate high quality CPR  
 - EPINEPHRINE q 4 minutes  
 - Atropine if vagal cause  
 - Consider transcutaneous pacing  
 - Consider reversible causes as below  
 \*\*\* If marginal perfusion but compressions not yet indicated, maximize oxygenation, consider pacing. Atropine; In ICU setting consider low dose EPINEPHRINE (1 mcg/kg or infusion), Glycopyrrolate, Isoproterenol

**CONSIDER REVERSIBLE CAUSES**

|                   |                         |                      |
|-------------------|-------------------------|----------------------|
| Hypoglycemia      | Hypovolemia             | Tamponade            |
| Hypo/hyperkalemia | Hydrogen Ion (Acidosis) | Tension Pneumothorax |
| Hypoxemia         | Hypothermia             | Toxic Ingestion      |
| Hypocalcemia      | Trauma                  | Thromboembolic       |

## FAST PULSE \*See Panel 5 for dosing

VT/Unstable SVT with no vascular access & assessment shows signs of shock but **WITH PULSE**  
 - **IMMEDIATE CARDOVERSION** (synchronized)  
 0.5 - 1 joule/kg first dose  
 May repeat @ 2 joule/kg  
 - Maximize Oxygenation  
 - Obtain Vascular Access

**Wide Complex VT** (QRS > 0.08 seconds) **Narrow Complex SVT** (QRS ≤ 0.08 seconds)  
 Consider antiarrhythmics  
 Amiodarone\*  
 Lidocaine  
 Adenosine  
 Consider Amiodarone\*  
 \* Consider pretreating with calcium to prevent hypotension

**PANEL 4**

| MEDICATIONS              |                                                                                                                                                                                                                                                                                                                                                        |
|--------------------------|--------------------------------------------------------------------------------------------------------------------------------------------------------------------------------------------------------------------------------------------------------------------------------------------------------------------------------------------------------|
| CARDIAC ARREST AND SHOCK |                                                                                                                                                                                                                                                                                                                                                        |
| ADENOSINE                | 0.1 mg/kg IV/IO Rapid Bolus<br>May repeat at 0.2 mg/kg, then 0.3 mg/kg IV/IO after 2 minutes<br>Max first dose 6 mg, Max subsequent dose 12 mg<br>administer using a stopcock attached to a 10 mL NS flush                                                                                                                                             |
| ALPROSTADIL              | FOR DUCTAL DEPENDENT LESIONS: 0.05 – 0.1 MCG/KG/MIN                                                                                                                                                                                                                                                                                                    |
| AMIODARONE               | 5 mg/kg IV/IO; Max single first dose: 300 mg; Max subsequent dose: 150 mg<br>Max total dose: 15 mg/kg/24 hours OR 2.2 G daily<br>Consider pretreatment with calcium to prevent hypotension<br>If no pulse, push undiluted<br>If pulse, dilute and give over 20-60 minutes<br>Monitor for hypotension<br>Post Resuscitation Infusion: 5 - 10 mcg/kg/min |
| ATROPINE                 | 0.02 mg/kg IV/IO, 0.04 - 0.06 mg/kg ETT<br>Min single dose 0.1 mg, Max single dose 0.5 mg Repeat q 5 minutes, to Max total dose 1 mg                                                                                                                                                                                                                   |
| CALCIUM CHLORIDE         | (10%) - 20 mg/kg IV/IO (0.2 mL/kg) over 5 minutes, Max dose of 1 G                                                                                                                                                                                                                                                                                     |
| CALCIUM GLUCONATE        | 60 mg/kg (Max 3 G)                                                                                                                                                                                                                                                                                                                                     |
| DEXTROSE                 | 0.5 – 1 G/kg (Max 50 G)<br>< 1 month: 5:10 mL/kg of 10% Dextrose<br>> 1 month: 2:4 mL/kg of 25% Dextrose<br>Adolescent: 1-2 mL/kg of 50% Dextrose                                                                                                                                                                                                      |
| EPINEPHrine              | 0.01 mg/kg of 1:10,000 IV/IO (0.1 mL/kg); Max single dose of 1 mg<br>0.1 mg/kg of 1:1000 ETT for >28 days (0.1 mL/kg); Max single dose of 2.5 mg<br>Administer q 4 min in cardiac arrest                                                                                                                                                               |
| GLUCAGON                 | < 20 kg: 0.5 mg and patients > 20 kg: 1 mg - IV/IM/SubQ, Max single dose 1 mg                                                                                                                                                                                                                                                                          |
| HYDROCORTISONE           | Shock - 2 mg/kg IV/IO/IM; Max single dose 100 mg                                                                                                                                                                                                                                                                                                       |
| INSULIN                  | 0.1 units/kg IV/IO with 0.5 G/kg of dextrose for hyperkalemia<br>Max dose of insulin 10 units; aspart or regular                                                                                                                                                                                                                                       |
| LIDOCAINE                | 1 mg/kg IV/IO, 2 - 3 mg/kg ETT Max dose of 100 mg<br>May repeat q 5 minutes to Max total dose 3 mg/kg<br>Post Resuscitation Infusion: 20 - 50 mcg/kg/min                                                                                                                                                                                               |
| MAGNESIUM SULFATE        | 50 mg/kg, Max dose of 2 G<br>If no pulse, push undiluted<br>If pulse, dilute and give over 20 - 60 minutes, Monitor for hypotension and bradycardia                                                                                                                                                                                                    |
| SODIUM BICARBONATE       | (8.4%) - 1 mEq/kg IV/IO<br>For infants < 10 kg, dilute with equal volume of sterile water<br>administer only with clear indication                                                                                                                                                                                                                     |
| VASOPRESSIN              | 0.4 units/kg dose IV/IO; Max dose of 40 units                                                                                                                                                                                                                                                                                                          |
| ADDITIONAL DRUGS         |                                                                                                                                                                                                                                                                                                                                                        |
| ALBUMIN                  | 5% albumin - 0.5 - 1 G/kg (10 - 20 mL/kg);<br>25% albumin - 0.5 - 1 G/kg (2 - 4 mL/kg);                                                                                                                                                                                                                                                                |
| CHARCOAL ACTIVATED       | Initial dose: 1 G/kg PO or gastric tube<br>Max dose of 10 G. Contact Poison Control @ 1-800-222-1222                                                                                                                                                                                                                                                   |
| DiphenhydRAMINE          | 1 mg/kg IV/IM/PO q 4 hours<br>Max total dose 50 mg (contains propylene glycol)                                                                                                                                                                                                                                                                         |
| FUROSEMIDE               | 1 mg/kg IV/IM q6 - 8 hours; 2 mg/kg PO q6 - 8 hours.<br>Max 200 mg IV/day, 600 mg PO/day.                                                                                                                                                                                                                                                              |
| NALOXONE                 | Respiratory depression: 0.001-0.005 mg/kg IV/IM/IO/SUBQ,<br>May reduce, Max dose: 0.1 mg<br>Full Reversal: 0.1 mg/kg IV/IO/IM/SUBQ; Max dose 2 mg                                                                                                                                                                                                      |
| RANITIDINE               | 0.5 - 1 mg/kg IV/IM q 6 - 8 hours, Max dose of 50 mg                                                                                                                                                                                                                                                                                                   |

**PANEL 5**

| MEDICATIONS                                                                                   |                                                                                                                                                                                                                                                                                                             |
|-----------------------------------------------------------------------------------------------|-------------------------------------------------------------------------------------------------------------------------------------------------------------------------------------------------------------------------------------------------------------------------------------------------------------|
| RESPIRATORY                                                                                   |                                                                                                                                                                                                                                                                                                             |
| INHALED BRONCHODILATORS                                                                       |                                                                                                                                                                                                                                                                                                             |
| ALBUTEROL                                                                                     | <20 kg: 2.5 mg; >20 kg: 5 mg, in 3 mL NS nebulized<br>May be repeated q 20 mins x 3 or continuous                                                                                                                                                                                                           |
| EPINEPHrine                                                                                   | Racemic: 0.25 - 0.5 mL of 2.25% solution in 2 mL NS nebulized<br>1:1000: 2.5 - 5 mL in 3 mL NS nebulized                                                                                                                                                                                                    |
| IPRATROPIUM                                                                                   | 0.25 - 0.5 mg/dose in 3 mL NS q20min x 3 acute use, then q4-8 hours;<br>May be given with albuterol                                                                                                                                                                                                         |
| IM/SubQ AND IV BRONCHODILATORS                                                                |                                                                                                                                                                                                                                                                                                             |
| IM/SubQ EPINEPHrine                                                                           | 0.01 mg/kg of 1:1000 (0.01 mL/kg) q 20 minutes x 3<br>Max single dose 0.5 mg                                                                                                                                                                                                                                |
| IM EPINEPHrine AUTOINJECTOR                                                                   | 10 - 29 kg: EpiPen Jr. 0.15 mg IM<br>> 30 kg: EpiPen 0.3 mg IM;<br>Used for pts with allergic reaction involving >2 systems<br>May redose q 5 - 15 min                                                                                                                                                      |
| MAGNESIUM SULFATE                                                                             | 75 mg/kg IV/IO (Max dose 2 G)<br>Give over 20 - 60 minutes. Monitor for hypotension/bradycardia                                                                                                                                                                                                             |
| TERBUTALINE                                                                                   | Loading dose: 2 - 10 mcg/kg IV over 30 minutes, Max dose of 1 mg<br>Initial infusion rate: 0.1 - 0.2 mcg/kg/minute, titrate up in increments of 0.1 - 0.2 mcg/kg/minute every 30 minutes<br>Max infusion rate: 4 mcg/kg/minute (note doses as high as 10 mcg/kg/min have been used) monitor cardiac enzymes |
| STEROIDS                                                                                      |                                                                                                                                                                                                                                                                                                             |
| DEXAMETHASONE                                                                                 | 0.25 - 0.5 mg/kg/dose IV/IO q6 hours for airway edema (Max dose 10 mg)<br>0.6 mg/kg/dose IM/PO for croup (Max dose 16 mg)                                                                                                                                                                                   |
| MethylPREDNISolone                                                                            | Loading dose: 2 mg/kg/dose IV/IM for status asthmaticus<br>Max loading dose of 60 mg.<br>Maintenance: 0.5mg/kg/dose IV/IM q 6 hours up to 5 days<br>Max maintenance dose 80 mg/day                                                                                                                          |
| PrednisolONE/<br>PredNISONE                                                                   | 2 mg/kg/day PO daily for acute asthma<br>Max total dose 80 mg/day                                                                                                                                                                                                                                           |
| SEDATION AND PAIN MANAGEMENT (Unintubated Patient) **                                         |                                                                                                                                                                                                                                                                                                             |
| **Apply O <sub>2</sub> , Monitor with ETCO <sub>2</sub> , Prepare equipment for airway rescue |                                                                                                                                                                                                                                                                                                             |
| ACETAMINOPHEN                                                                                 | 10 - 15 mg/kg/dose q 4 - 6 hours PO/PR (Max single dose 650 mg); IV dose 12.5 mg/kg/dose IV (see reference for further dosing as interval dependent on age)<br>Contraindicated in patients with known hepatic disease                                                                                       |
| BARBITUATE                                                                                    | listed under neuro/seizure and increased ICP sections                                                                                                                                                                                                                                                       |
| BENZODIAZEPINES                                                                               | listed under induction and neuro/seizure sections                                                                                                                                                                                                                                                           |
| FentaNYL                                                                                      | 0.5 - 1 mcg/kg IV/IO q 30-60 minutes, Max dose 50 mcg.<br>Intranasal dosing: 1 - 2 mcg/kg using an atomizer (Max dose 100 mcg);<br>risk of rigid chest<br>Give no faster than 1 mcg/kg/minute                                                                                                               |
| HYDRomorphone                                                                                 | 0.015 mg/kg IV q 4 - 6 hrs PRN, (Max dose 1 mg for opiate naive patients for IV dosing.) 0.03 - 0.08 mg/kg PO q4 - 6 hrs PRN, (Max dose of 4 mg for opiate naive patients.)                                                                                                                                 |
| IBUPROFEN                                                                                     | 10 mg/kg/dose PO q 6 - 8 hrs (Max single dose 800 mg)<br>Max dose 40 mg/kg/day<br>Contraindicated in patients with trauma or bleeding disorder.                                                                                                                                                             |
| KETAMINE                                                                                      | 0.5 - 1 mg/kg IV, Max dose of 150 mg                                                                                                                                                                                                                                                                        |
| KETOROLAC                                                                                     | 0.5 - 1 mg/kg IV/IM q 6-8 hours<br>Max single dose 30 mg. Caution with renal insufficiency.<br>Contraindicated in patients with trauma or bleeding disorder                                                                                                                                                 |
| MORPHINE                                                                                      | 0.05 - 0.1 mg/kg IV/IM/IO/SubQ Max adult dose 5 mg.                                                                                                                                                                                                                                                         |

**PANEL 6**

| MEDICATIONS                                                                            |                                                                                                                                                                                                                                                                |
|----------------------------------------------------------------------------------------|----------------------------------------------------------------------------------------------------------------------------------------------------------------------------------------------------------------------------------------------------------------|
| VASOACTIVE INFUSIONS                                                                   |                                                                                                                                                                                                                                                                |
| DOPamine                                                                               | 5 - 20 mcg/kg/min                                                                                                                                                                                                                                              |
| DOBUTamine                                                                             | 2 - 20 mcg/kg/min                                                                                                                                                                                                                                              |
| EPINEPHrine                                                                            | 0.01 - 0.2 mcg/kg/min, up to 1 in severe circumstances                                                                                                                                                                                                         |
| ESMOLOL                                                                                | 50 - 300 mcg/kg/min                                                                                                                                                                                                                                            |
| ISOPROTERENOL                                                                          | 0.05 - 2 mcg/kg/min                                                                                                                                                                                                                                            |
| MILRINONE                                                                              | Loading dose: 50 mcg/kg IV over 10-60 minutes<br>Infusion: 0.25 - 1 mcg/kg/min<br>consider dose adjustment with renal dysfunction                                                                                                                              |
| NICARDIPINE                                                                            | 0.5 - 5 mcg/kg/min                                                                                                                                                                                                                                             |
| NITROGLYCERIN                                                                          | 0.5 - 20 mcg/kg/min                                                                                                                                                                                                                                            |
| NITROPRUSSIDE                                                                          | 0.5 - 10 mcg/kg/min; caution cyanide toxicity                                                                                                                                                                                                                  |
| NOREPINEPHRINE                                                                         | 0.01 - 0.2 mcg/kg/min, up to 1 in severe circumstances                                                                                                                                                                                                         |
| PHENYLEPHRINE                                                                          | Bolus: Usual starting bolus dose 1 mcg/kg and range per effect 1 - 10 mcg/kg; consider up to 30 mcg/kg for Blocked BT shunt or Tet spell); Max single dose of 200 mcg<br>Infusion: 0.5 - 5 mcg/kg/minute                                                       |
| VASOPRESSIN                                                                            | 0.5 - 2 MILLIUnits/kg/min for hypotension;<br>0.5 - 10 MILLIUnits/kg/hr for DI                                                                                                                                                                                 |
| ANTIBIOTICS - FIRST DOSE<br>FREQUENCY DETERMINED BY AGE, INDICATION AND RENAL FUNCTION |                                                                                                                                                                                                                                                                |
| ACYCLOVIR                                                                              | Dose using IBW; < 12 yrs: 20 mg/kg/dose IV;<br>> 12 yrs: 10 mg/kg/dose IV                                                                                                                                                                                      |
| AMPICILLIN                                                                             | 25 - 50 mg/kg/dose IV/IM<br>50 - 100 mg/kg/dose IV/IM for severe infections.<br>(Max dose 2 G)                                                                                                                                                                 |
| CEFAZOLIN                                                                              | 25 mg/kg/dose IV (Max dose 2 G)                                                                                                                                                                                                                                |
| CEFEPIME                                                                               | 50 mg/kg/dose IV (Max dose 2 G)                                                                                                                                                                                                                                |
| CEFOTAXIME                                                                             | 50 mg/kg/dose (Max dose 2 G)                                                                                                                                                                                                                                   |
| CaTRIAXone                                                                             | 50 - 75 mg/kg/dose IV<br>50 mg/kg/dose q12 hours IV/IM for meningitis.<br>Use with caution in patients with penicillin allergy<br>Contraindicated in infants < 1 month of age. Do not administer with calcium-containing solutions or products. (Max dose 2 G) |
| GENTAMICIN                                                                             | 2.5 mg/kg/dose IV/IM Infuse over 30 minutes. Obtain peak and trough levels with third dose.<br>Dose based on Ideal Body Weight (IBW) unless the patient is a neonate or underweight                                                                            |
| MEROPENEM                                                                              | 33 mg/kg/dose IV (Max dose 2 G)                                                                                                                                                                                                                                |
| PIPERACILLIN/<br>TAZOBACTAM                                                            | Dosing based on piperacillin content. 100 mg/kg/dose IV (Max dose 4 G)                                                                                                                                                                                         |
| VANCOMYCIN<br>EMPIRIC DOSING                                                           | 15 mg/kg/dose IV/IO<br>20 mg/kg/dose IV/IO for meningitis, pneumonia, osteomyelitis, and MRSA bacteremia<br>(Max dose 2 G) Infuse over 60 minutes<br>Evaluate trough levels in patients with varying renal function                                            |

NOTE: Every effort has been made to ensure these drug dosages and procedures are in accordance with accepted standards at time of publication. The user is urged to check the product information sheet included in each medication package, which includes recommended doses, warnings and contraindications. JANUARY 2015

**PANEL 7**

| MEDICATIONS                                                                                   |                                                                                                                                                                                                                                 |
|-----------------------------------------------------------------------------------------------|---------------------------------------------------------------------------------------------------------------------------------------------------------------------------------------------------------------------------------|
| NEURO/SEIZURES**                                                                              |                                                                                                                                                                                                                                 |
| **Apply O <sub>2</sub> , Monitor with ETCO <sub>2</sub> , Prepare equipment for airway rescue |                                                                                                                                                                                                                                 |
| DIAZEPAM                                                                                      | 0.05 - 0.1 mg/kg IV/IO q 15 - 30 minutes, 0.2 mg/kg PR<br>Max total dose 10 mg                                                                                                                                                  |
| LORazepam                                                                                     | 0.05 - 0.1 mg/kg IV/IO/IM<br>Max total dose 4 mg (contains propylene glycol).                                                                                                                                                   |
| MIDAZOLAM                                                                                     | 0.1 mg/kg IV/IO/IM Max total sedative dose 4 mg.<br>Intranasal: 0.2 - 0.3 mg/kg/dose Max 10 mg using an atomizer                                                                                                                |
| FOSPHENYTOIN                                                                                  | Loading dose: 15 - 20 mg phenytoin equivalent (PE)/kg IV/IO/IM<br>Max dose of 2 G. Must be diluted for IV/IO administration<br>Max infusion rate: 3 mg PE/kg/min or 150 mg/min                                                  |
| PHENobarbital                                                                                 | Loading dose: 15 - 20 mg/kg IV/IO SLOWLY, then 5 mg/kg/dose q 20 minutes until seizures controlled. Max dose 1 G<br>Max total dose 30 mg/kg                                                                                     |
| levETIRAcetam                                                                                 | Loading dose: 20 mg/kg IV/IO over 15 minutes (Max 1.5 G)                                                                                                                                                                        |
| INCREASED ICP (See PANEL 1 for ICP Management)                                                |                                                                                                                                                                                                                                 |
| HYPERTONIC SALINE                                                                             | To 7 Na by 5: 2% NaCl/NaHCO3 (buffered saline) - 10 mL/kg;<br>2% NaCl - 9 mL/kg; 3% NaCl - 6 mL/kg                                                                                                                              |
| MANNITOL                                                                                      | Initial dose: 0.25 - 1 G/kg IV over 2 minutes, may repeat once<br>Must use inline filter. Larger doses may require a fluid bolus to avoid hypotension                                                                           |
| PENTobarbital                                                                                 | 1 - 3 mg/kg IV, 2 - 6 MG/KG PO/IM/PR<br>Max dose 100 mg ***total or single dose***                                                                                                                                              |
| INTUBATION MEDICATIONS                                                                        |                                                                                                                                                                                                                                 |
| PREMEDICATIONS                                                                                |                                                                                                                                                                                                                                 |
| ATROPINE                                                                                      | 0.02 mg/kg IV/IO/IM.<br>Min dose 0.1 mg Max dose 0.5 mg                                                                                                                                                                         |
| GLYCOPYRRROLATE                                                                               | 0.004 mg/kg IV/IM; Max dose 0.1 mg                                                                                                                                                                                              |
| LIDOCAINE                                                                                     | 1 mg/kg IV/IO for patient's at risk for increased ICP or bronchospasm<br>Max dose 100 mg                                                                                                                                        |
| INDUCTION AGENTS                                                                              |                                                                                                                                                                                                                                 |
| ETOMIDATE                                                                                     | 0.3 mg/kg IV/IO for nonintensive patient<br>0.15 mg/kg IV/IO for hypotensive patient<br>Max dose 20 mg                                                                                                                          |
| FentaNYL                                                                                      | 1 - 2 mcg/kg IV/IO q 30 - 60 minutes Max single dose of 100 mcg<br>Give no faster than 1 mcg/kg/min (risk of rigid chest) if occurs, consider naloxone or paralytic with BMV.                                                   |
| KETAMINE                                                                                      | 1 - 2 mg/kg IV/IO; 2 - 5 mg/kg IM. Max single dose of 150 mg<br>consider for bronchodilation properties                                                                                                                         |
| MIDAZOLAM                                                                                     | 0.05 - 0.1 mg/kg IV/IO Max single dose of 4 mg                                                                                                                                                                                  |
| PROPOFOL (Induction Only)                                                                     | 2 mg/kg IV/IO                                                                                                                                                                                                                   |
| PARALYTICS administration with a sedative is recommended                                      |                                                                                                                                                                                                                                 |
| PANCURONIUM                                                                                   | 0.1 mg/kg/dose IV/IO q 30 - 60 minutes, paralyzing dose<br>0.01 mg/kg, defasciculating dose                                                                                                                                     |
| ROCURONIUM                                                                                    | 1.2 mg/kg IV/IO (Max dose 100 mg)                                                                                                                                                                                               |
| SUCCINYLCHOLINE                                                                               | 1 - 2 mg/kg IV/IO (Max 200 mg IV)<br>2 - 4 mg/kg IM (Max 150 mg IM - due to limited volume for IM meds)<br>Can use 4 mg/kg IM to break laryngospasm<br>Contraindicated in patients with neuromuscular disease and renal failure |
| VECURONIUM                                                                                    | 0.1 - 0.2 mg/kg IV/IO q 30 - 60 minutes (Max dose 10 mg)                                                                                                                                                                        |

**PANEL 8**
